# Supplementary material for: Distinct kinetics of molecular gelation in a confined space and its relation to the structure and property of thin gel films
Source: Royal Society of Chemistry journal article supplement (doi:10.1039/c4cp05715e), 2015-01-01
Supplement: c4cp05715e1.pdf [file c4cp05715e1.pdf]

## Distinct Kinetics of Molecular Gelation in a Confined Space and Its Relation to the Structure and Property of Thin Gel Films

Yu Liu,<sup>a</sup> Wen-Jing Zhao,<sup>a</sup> Jing-Liang Li,<sup>\*b</sup> Rong-Yao Wang,<sup>\*a</sup>

<sup>a</sup> Key Laboratory of Cluster Science of Ministry of Education, School of Physics, Beijing Institute of Technology, Beijing, China, 100081. Email: [wangry@bit.edu.cn](mailto:wangry@bit.edu.cn)

<sup>b</sup> Institute for Frontier Materials, Deakin University, Waurn Ponds, Victoria, Australia 3216.  
E-mail: [jli@deakin.edu.au](mailto:jli@deakin.edu.au)

### 1. The procedure of thermal control used in the dynamic rheological measurements and evolution of the storage modulus in the process of sol-to-gel transition for the GP-1/PG gelling system.

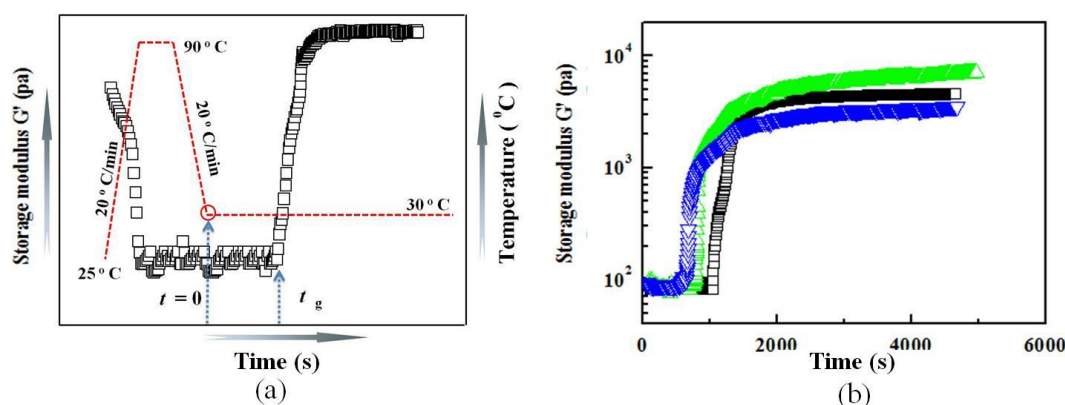

**Fig. S1** (a) The procedure of thermal control used in the dynamic rheological measurements for the GP-1/PG gelling system. (b) Evolution of the storage modulus in the process of sol-to-gel transition of a 3 wt % GP-1/PG system at different gap sizes:  $\square$ : 80  $\mu\text{m}$ ,  $\triangle$ : 500  $\mu\text{m}$ ,  $\nabla$ : 800  $\mu\text{m}$ .

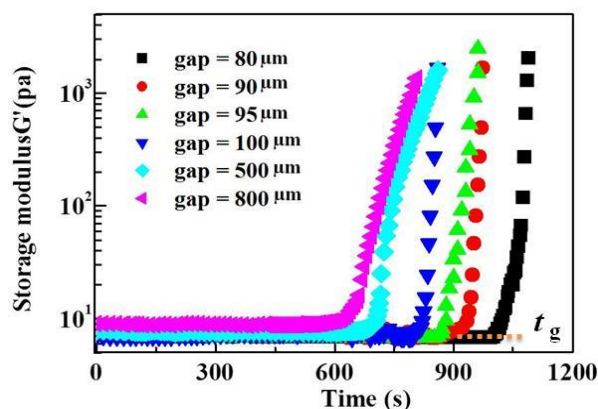

**Fig. S2** Evolution of storage modulus at the induction stage of sol-to-gel transition of a 3 wt % GP-1/PG system at different gap sizes.

## 2. Kinetic analyses of GP-1/PG gel formation

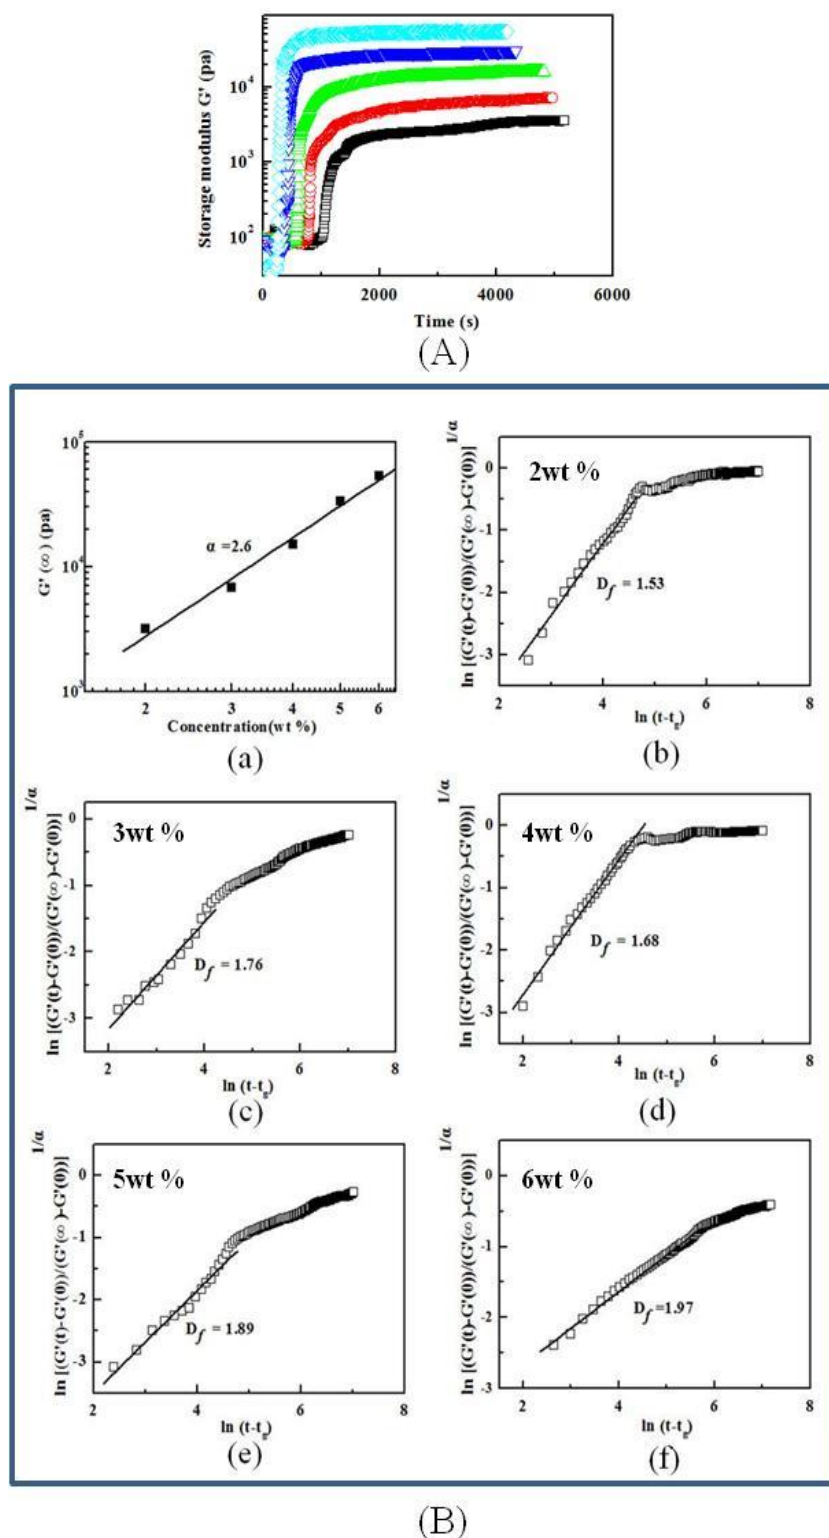

**Fig. S3** A: Evolution of storage modulus in the process of sol-to-gel transition:  $\square$ : 2wt %,  $\circ$ : 3wt %,  $\triangle$ : 4wt %,  $\nabla$ : 5wt %,  $\diamond$ : 6 wt %. B: Fractal analysis of the kinetic data acquired by dynamic rheological measurements and in terms of the extended Dickinson model (eqn (1)) for the GP-1/PG gels of different concentrations. (a) power-law behaviours of the storage moduli of the elastic moduli with respect to the gelator concentrations. (b-e) The linear

fits were conducted for the first stage of the kinetic processes to extract the  $D_f$  values. All the gels were formed within a gap of 500  $\mu\text{m}$ .

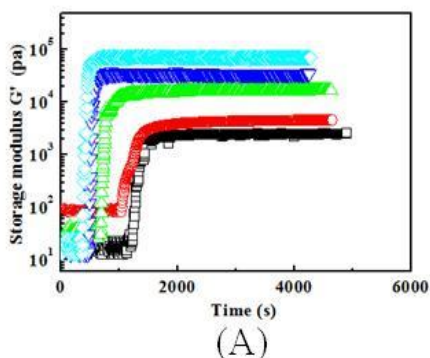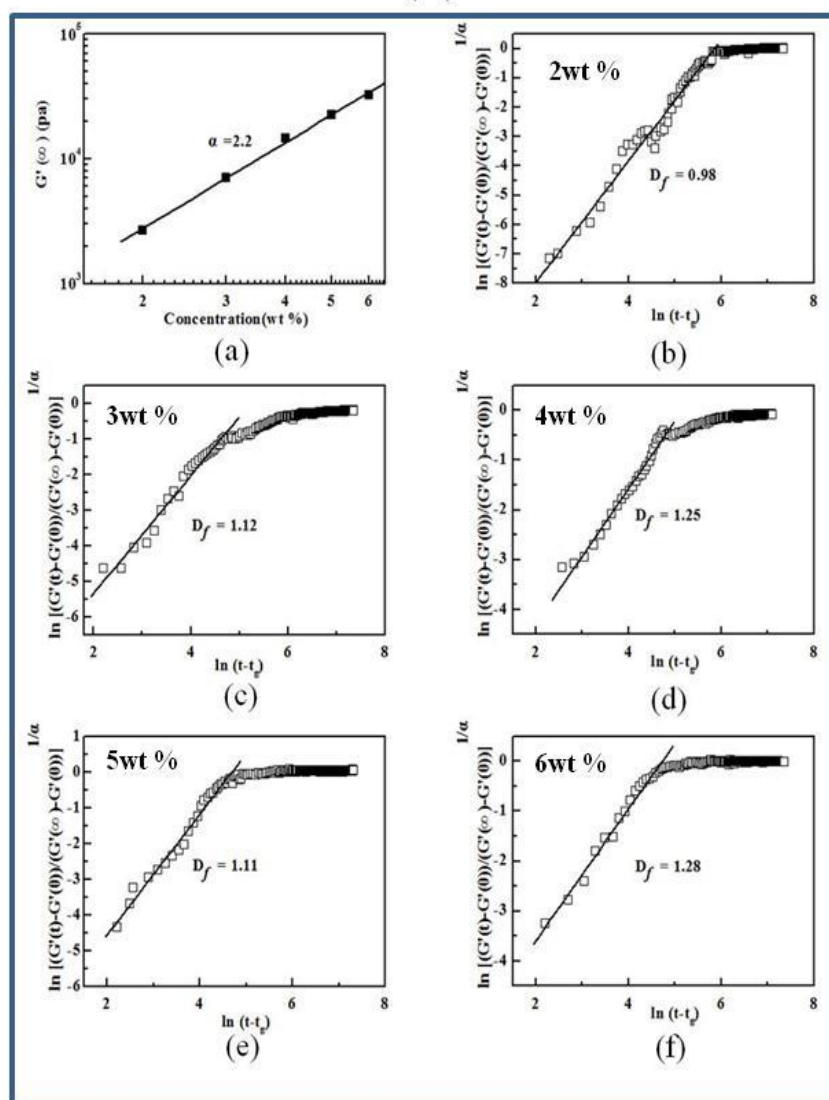

(B)

**Fig. S4** A: Evolution of storage modulus in the process of sol-to-gel transition:  $\square$ : 2wt %,  $\circ$ : 3wt %,  $\triangle$ : 4wt %,  $\nabla$ : 5wt %,  $\diamond$ : 6 wt %. B: Fractal analysis of the kinetic data acquired by dynamic rheological measurements and in terms of the extended Dickinson model (eqn (1)) for the GP-1/PG gels of different concentrations. (a) power-law behaviours of the storage moduli of the elastic moduli with respect to the gelator concentrations. (b-e) The linear

fits were conducted for the first stage of the kinetic processes to extract the  $D_f$  values. All the gels were formed within a gap of 80  $\mu\text{m}$ .

### 3. Optical and electron micrographs

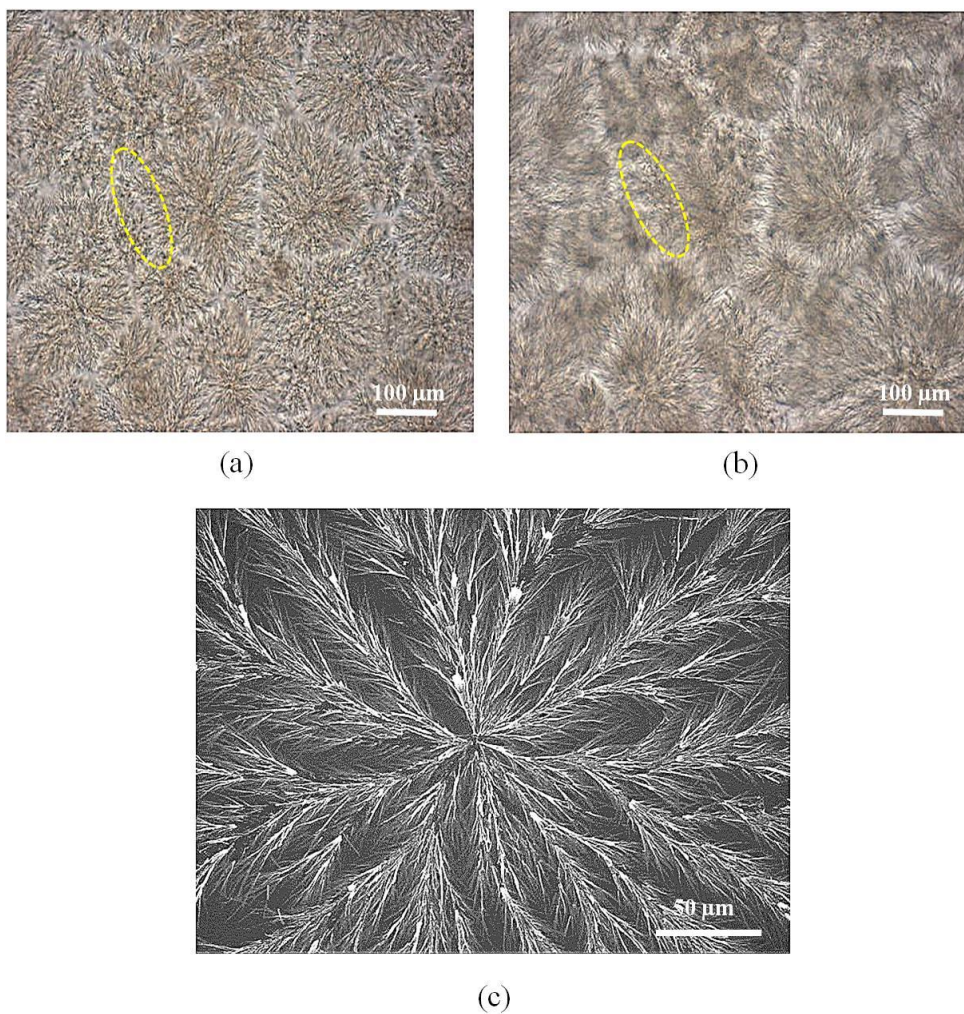

**Fig. S5** The microstructures of 3wt % GP-1/PG gel film formed at gap  $\sim 800$   $\mu\text{m}$ . The gelation temperature is 30  $^{\circ}\text{C}$  and the cooling rate is 20  $^{\circ}\text{C}/\text{min}$ : Optical micrographs of the 3D spherulitic networks from the middle (a) and lower planes (b), and SEM image (c).

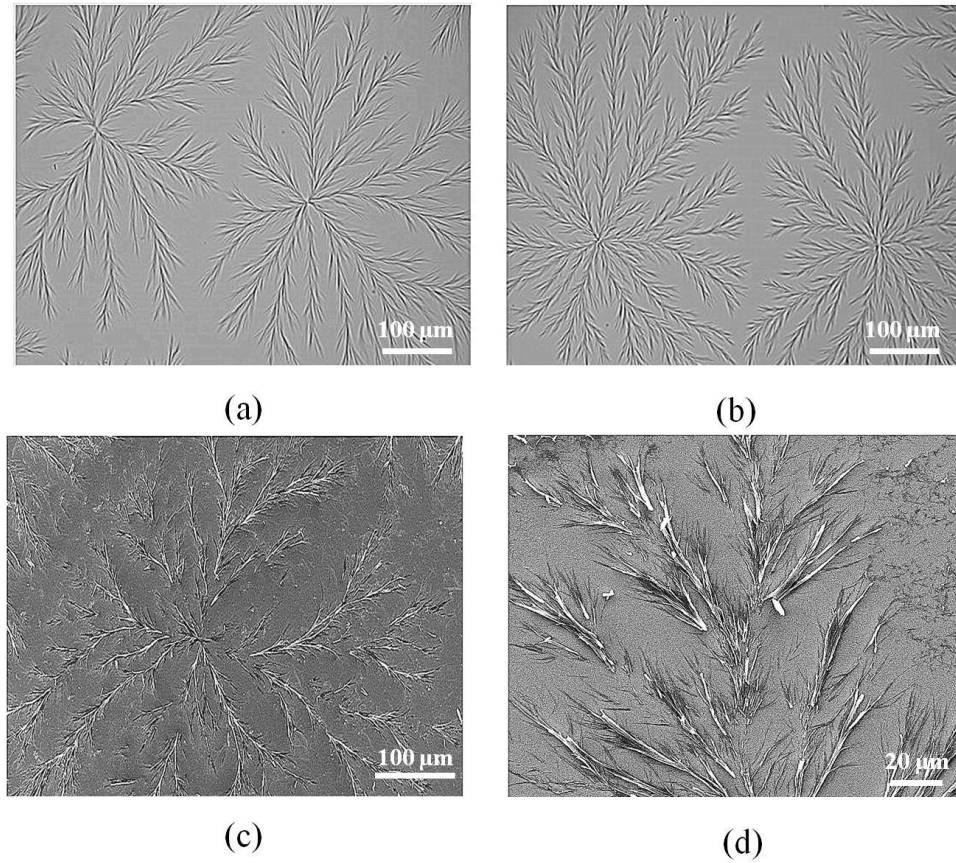

**Fig. S6** The microstructures of 3wt % GP-1/PG gel film formed at gap  $\sim 100 \mu\text{m}$ . The gelation temperature is  $30 \text{ }^\circ\text{C}$  and the cooling rate is  $20 \text{ }^\circ\text{C}/\text{min}$ : (a, b) Optical micrographs; (c, d) SEM images.

#### **4. Estimation of the fractal dimension ( $D_f$ ) of the spherulitic network by an image analysis method**

As in previous studies, <sup>[1-4]</sup> The fractal dimension  $D_f$  of a fiber network can be estimated directly by some image analyses methods, such as the box counting method, Sandbox method and the area - the radius of gyration method. Herein, Box Counting method was used to estimate the values of  $D_f$  for the spherulitic networks formed with and without space confinement.

The box counting dimension is computed by superimposing on the object a grid of size  $\varepsilon$ , counting how many boxes  $N(\varepsilon)$  contain the object, and repeating the task for various box sizes  $\varepsilon$ .

$$N(\varepsilon) \propto \varepsilon^{-D_f}$$

where  $N(\varepsilon)$  is the number of boxes needed to cover entirely the object and  $D_f$  is the fractal dimension.  $\varepsilon$  is made progressively smaller and the corresponding number of non-empty boxes,  $N(\varepsilon)$  are counted.

The logarithm of  $N(\varepsilon)$  versus the logarithm of  $\varepsilon$ , gives a line whose gradient corresponds to  $D_f$ . Herein we used a software (FracLac for ImageJ) to do fractal analyses.

For the spherulitic networks formed without space confinement, the SEM micrographs were used to estimate the value of  $D_f$ , as shown in Fig. S7.

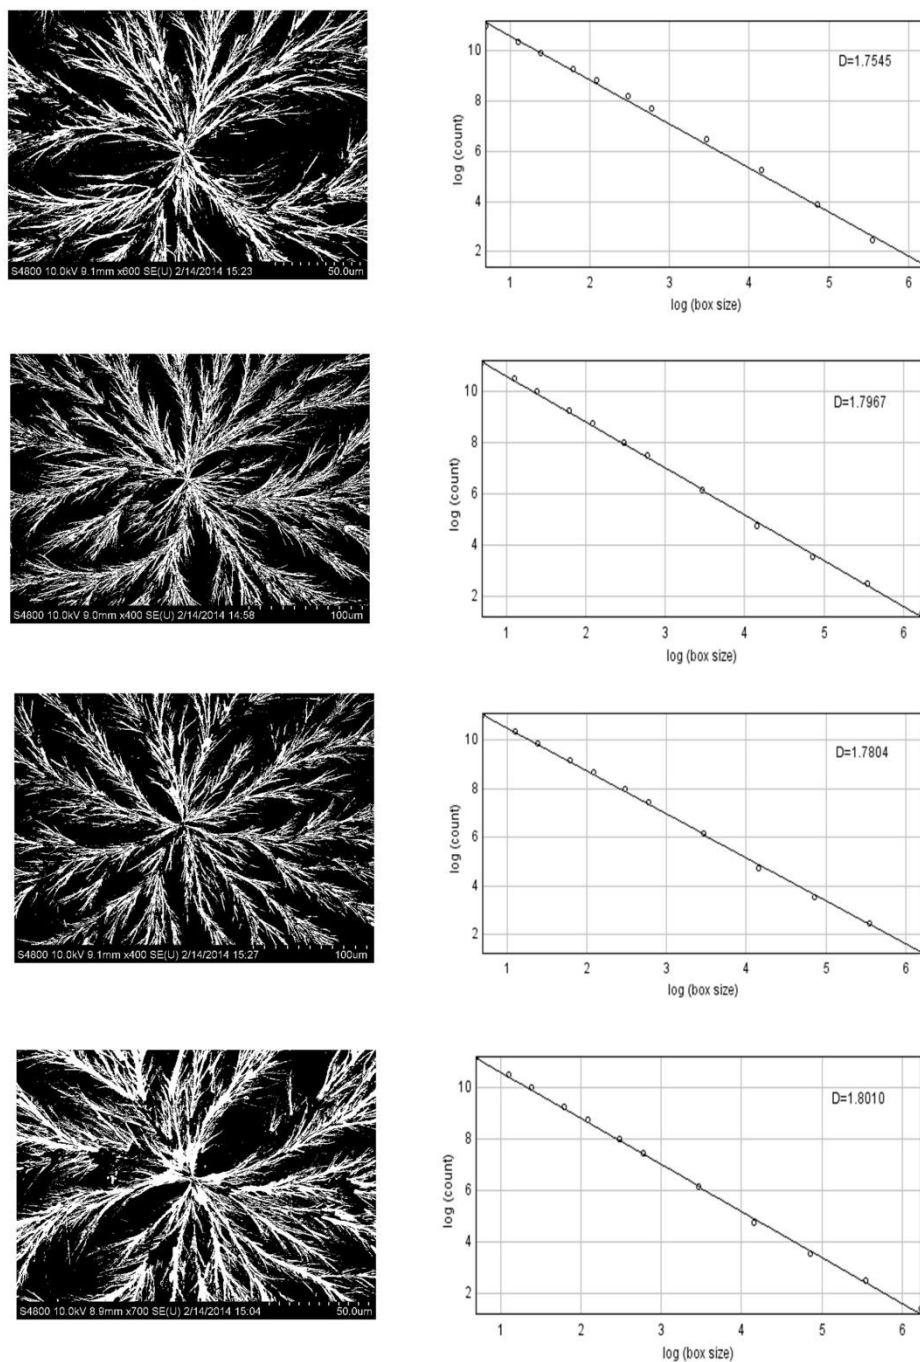

**Fig. S7** SEM images (left) and the estimation of  $D_f$  by the box-counting method (right, FracLac for ImageJ)

software) for a 3wt % GP-1/PG gel formed at the gap size of  $\sim 800 \mu\text{m}$ .

For the spherulitic networks formed with space confinement, the OM micrographs were used to estimate the value of  $D_f$ , as shown in Fig. S8.

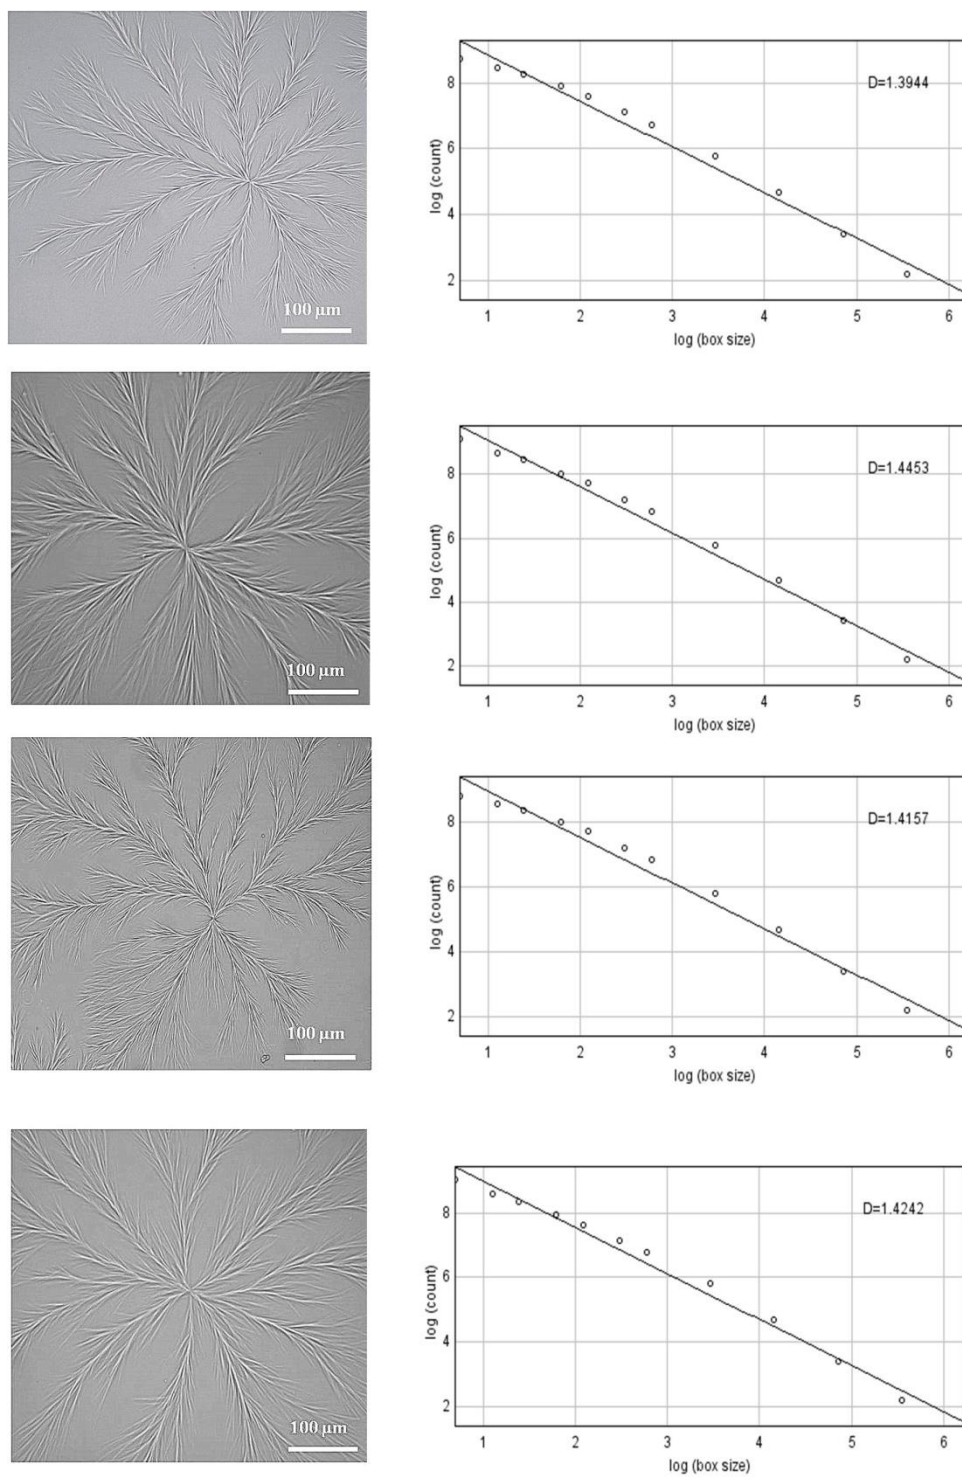

**Fig. S8** Optical micrographs (left) and the estimation of  $D_f$  (right, FracLac for ImageJ software) for 3wt % GP-1/PG gel formed at the gap size of  $\sim 50 \mu\text{m}$ .

## 5. Rheological properties of the GP-1/PG gels

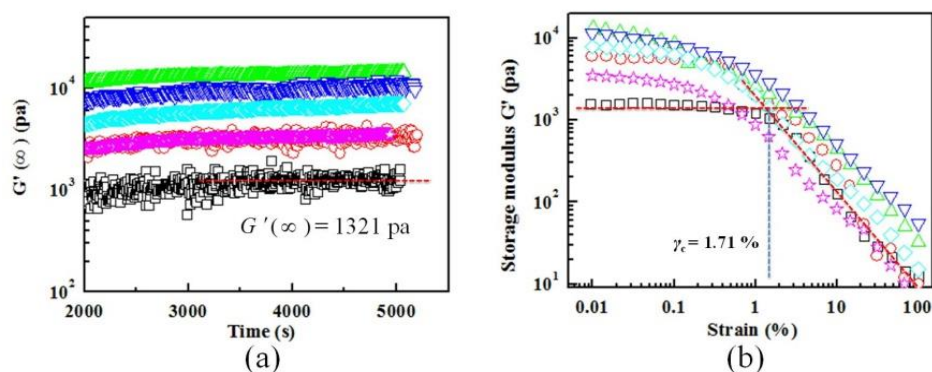

**Fig. S9** Raw data of measuring the storage modulus of the quasi-equilibrium state  $G'(\infty)$  (a) and the critical strain  $\gamma_c$  (b) of a 3wt % GP-1/PG gel formed at different gap sizes.  $\square$ : 50  $\mu\text{m}$ ,  $\circ$ : 80  $\mu\text{m}$ ,  $\triangle$ : 100  $\mu\text{m}$ ,  $\nabla$ : 200  $\mu\text{m}$ ,  $\diamond$ : 500  $\mu\text{m}$ ,  $\star$ : 800  $\mu\text{m}$ .

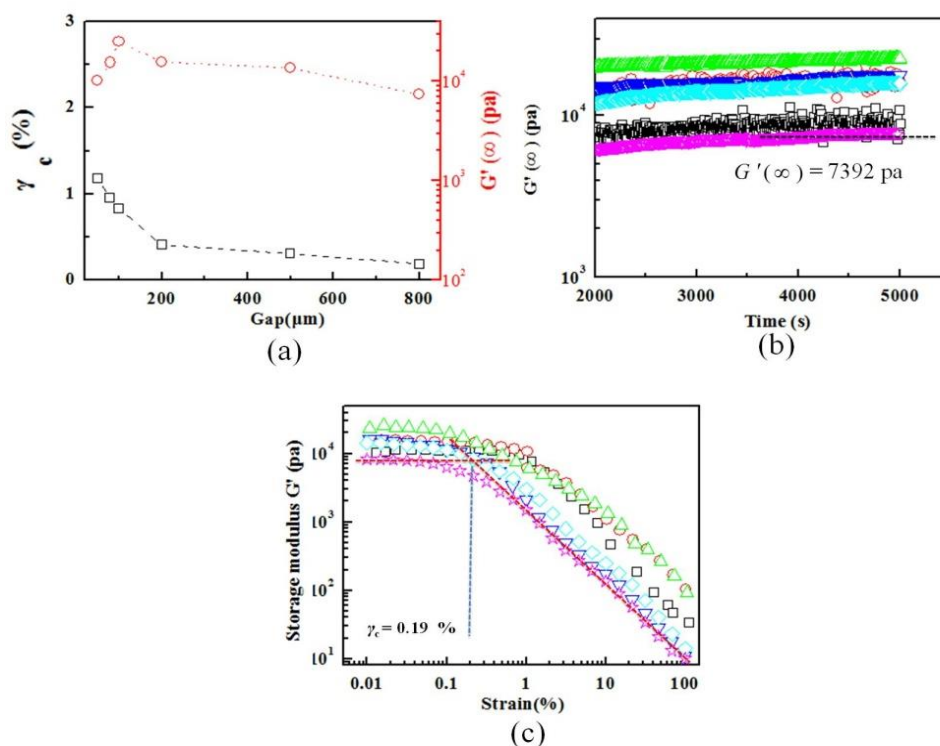

**Fig. S10** (a) Variation of the storage modulus ( $\circ$ ) at the quasi-equilibrium state and strain ( $\square$ ) as a function of gap size, acquired from the 4 wt % GP-1/PG system. (b,c) Raw data of the measured storage modulus of the quasi-equilibrium state  $G'(\infty)$  (b) and the critical strain  $\gamma_c$  (c) from the 4 wt % GP-1/PG gel formed at different gap sizes.  $\square$ : 50  $\mu\text{m}$ ,  $\circ$ : 80  $\mu\text{m}$ ,  $\triangle$ : 100  $\mu\text{m}$ ,  $\nabla$ : 200  $\mu\text{m}$ ,  $\diamond$ : 500  $\mu\text{m}$ ,  $\star$ : 800  $\mu\text{m}$ .



## 6. Effects of space confinement on the GP-1/Octanol gelling system

### 6.1. Structural transition from 3D to quasi-2D fiber network

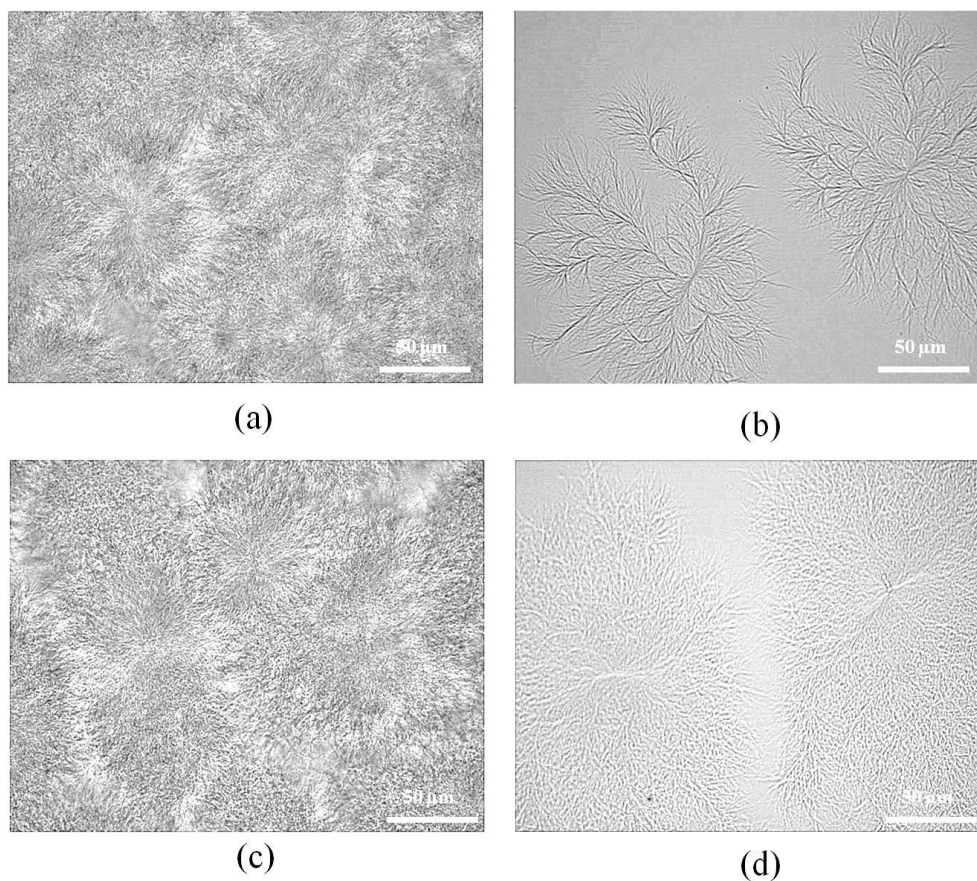

**Fig. S11** Optical micrographs of the spherulitic networks obtained from 6 wt % (a, b) and 10 wt % (c,d) GP-1/octanol gels. (a,c) gap  $\sim$  200  $\mu\text{m}$ , (b,c) gap  $\sim$  50  $\mu\text{m}$ . The gelation temperatures for the 6 wt % and 10 wt % GP-1/octanol are set at 15  $^{\circ}\text{C}$  and 25  $^{\circ}\text{C}$ , respectively.

### 6.2 Modification of the rheological properties of the GP-1/Octanol gel films

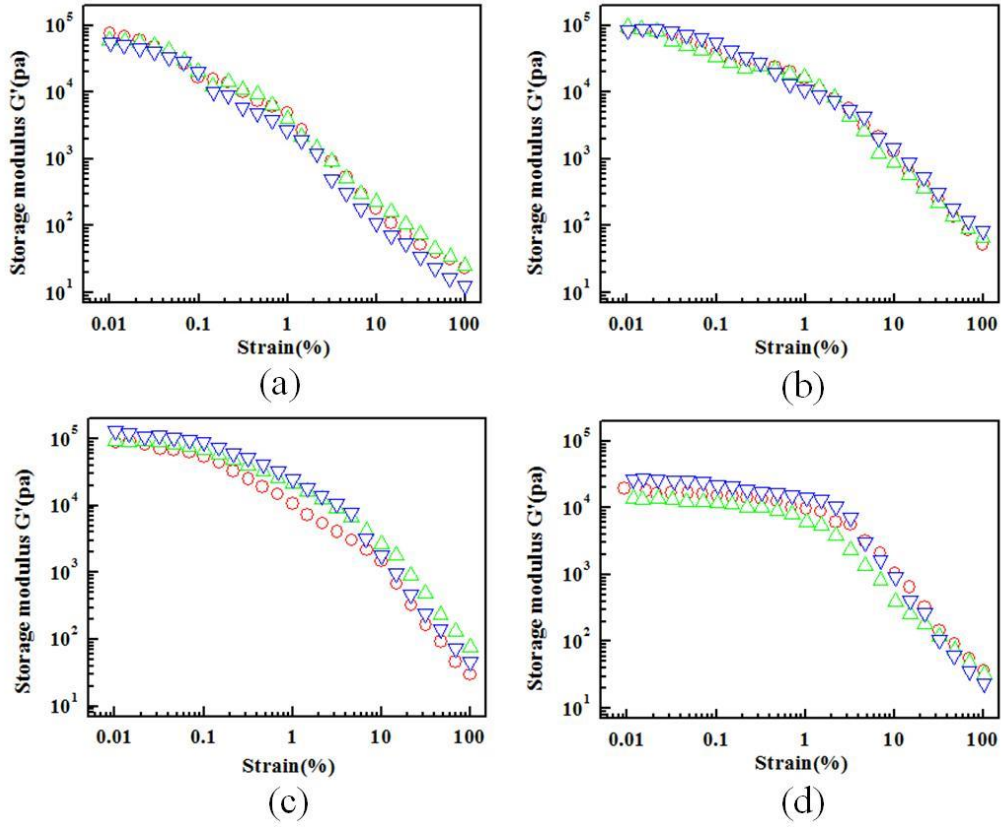

**Fig. S12** The critical strain  $\gamma_c$  from the 10 wt % GP-1/ octanol gel formed at the gelation temperature of 25 °C with a cooling rate of 20 °C/min : (a) gap=200  $\mu\text{m}$ ; (b) gap=100  $\mu\text{m}$ ; (c) gap=80  $\mu\text{m}$ ; (d) gap=50  $\mu\text{m}$ .  $\circ$ : First measurement;  $\triangle$ : Second measurement;  $\nabla$ : Third measurement.

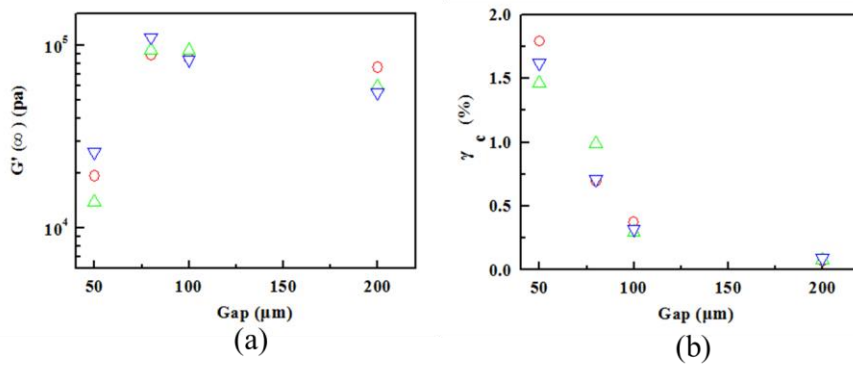

**Fig. S13** Variation of the storage modulus (a) at the quasi-equilibrium state and the critical strain (b) as a function of gap size. 10 wt % GP-1/ octanol system is used. The gelation temperature is 25 °C and the cooling rate is 20 °C /min.  $\circ$ : First measurement;  $\triangle$ : Second measurement;  $\nabla$ : Third measurement.

## References

1. E. Fernández, J.A. Bolea, G. Ortega and E. Louis, *J. Neurosci. Meth.*, 1999, **89**, 151.
2. G. Landini, P. I. Murray and G. P. Misson, *Invest. Ophth. Vis. Sci.* , 1995, **36**, 2749.
3. T. G. Smith, Jr, G. D. Lange and W. B Marks, *J. Neurosci. Meth.*, 1996, **69**, 123.
4. A. N. D. Posadas, D. Giménez, M. Bittelli, C. M. P. Vaz and M. Flury, *Soil Sci. Soc. Am. J.*, 2001, **65**, 1361.
